# Supplementary material for: Structure-Based De Novo Design for the Discovery of Miniprotein Inhibitors Targeting Oncogenic Mutant BRAF
Source: MDPI journal article supplement (doi:10.3390/ijms25105535), 2024-05-19

## *Supplementary Material*

# **Structure-Based *De Novo* Design for the Discovery of Miniprotein Inhibitors Targeting Oncogenic Mutant BRAF**

*Jae Min Ham<sup>a,1</sup>, Myeongbin Kim<sup>a,1</sup>, Taeho Kim<sup>2</sup>, Seong Eon Ryu<sup>1,\*</sup> and Hwangseo Park<sup>2,\*</sup>*

<sup>1</sup>*Department of Bioengineering, College of Engineering, Hanyang University, 222 Wangsimri-ro, Seong-dong-gu, Seoul 04763, Korea.*

<sup>2</sup>*Department of Bioscience and Biotechnology, Sejong University, 209 Neungdong-ro, Kwangjin-gu, Seoul 05006, Korea*

<sup>a</sup>*These authors contributed equally to this work.*

**Figure S1.** Amino acid sequence alignments of 14-3-3 (residues 164-232) with miniproteins (a) 76 and (b) 63. Identical and similar residues are colored in red and green, respectively.

(a)

```
14-3-3 164 THPIRLGLALNFSVFYYEILNSPKACQLAKQAFDDAELDTLNEDSYKDSTLIMQLLR
miniprot 1 SIQGGARQCLVSKIKCTVANEWLDRLSLTSKAFMFVLLNEIDMLDIMLEAMGISTEEDR
```

```
14-3-3 224 DNLTLWTSD 232
miniprot 61 EHQTTRRVNY 69
```

(b)

```
14-3-3 164 THPIRLGLALNFSVFYYEILNSPKACQLAKQAFDDAELDTLNEDSYKDSTLIMQLLR
miniprot 1 -SIQGGARQCLVSKIKCTVANEWLDRLSLTSKAFMFVLLNEIDMLDIMLEAMGISTEEDR
```

```
14-3-3 224 DNLTLWTSD- 232
miniprot 60 REHQTTRRVNY 69
```

**Figure S2.** 3D structural alignments of (a) backbone groups and (b) sidechains of 14-3-3, miniprotein 76, and miniprotein 63. Sidechain atoms of 14-3-3, miniprotein 76, and miniprotein 63 are indicated in green, cyan, and blue, respectively.

(a)

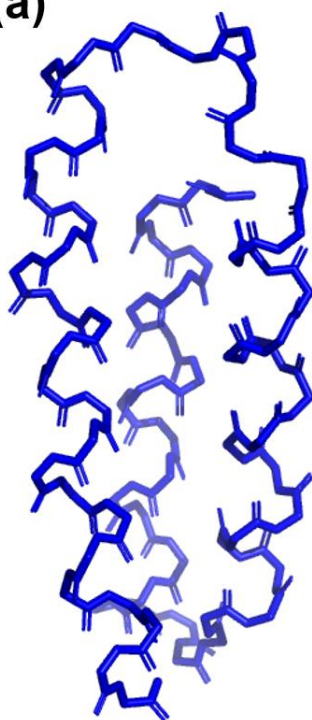

(b)

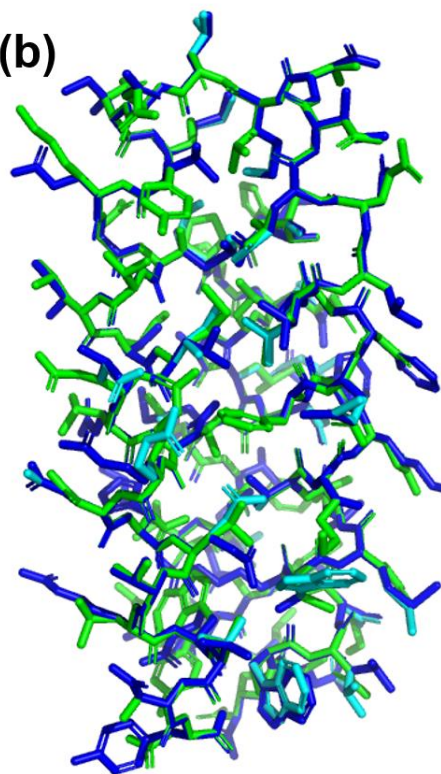

Supplement: s1 [file s1]
